# Supplementary material
Source: PubMed Central journal article supplement (PMC2924017)

## SUPPLEMENTAL FIGURE 1

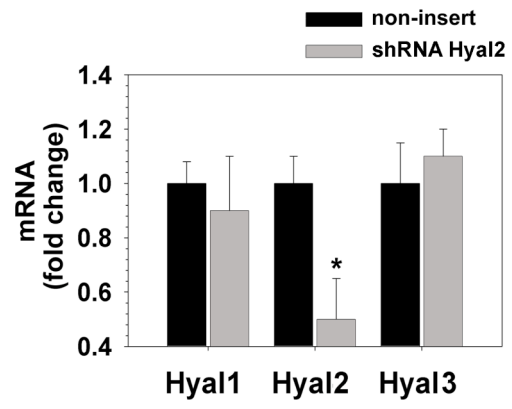

Supplement: supp_M110.135194_jbc.M110.135194-1.pdf [file supp_M110.135194_jbc.M110.135194-1.pdf]
